# Supplementary material for: HERV-W and Mycobacterium avium subspecies paratuberculosis Are at Play in Pediatric Patients at Onset of Type 1 Diabetes
Source: MDPI journal article supplement (doi:10.3390/pathogens10091135), 2021-09-03
Supplement: s1 [file s1]

**Table S1.** Clinical Data T1D ( $n = 71$ ).

| ID     | Disease T1D      | Comorbidity                | Familiarity Disease                                 | HbA1c |
|--------|------------------|----------------------------|-----------------------------------------------------|-------|
| T1D 1  | Onset            | --                         | Grandmother with T1D                                | 13.5% |
| T1D 2  | T1D for 5 years  | Hashimoto thyroiditis (HT) | Two aunts with T1D                                  | --    |
| T1D 4  | Onset            | --                         | Grandmother with T1D / Paternal uncle with T1D      | 10.1% |
| T1D 5  | T1D for 4 years  | Coeliac                    | Uncle with T1D                                      | --    |
| T1D 6  | T1D for 4 years  | --                         | Mother with HT                                      | --    |
| T1D 7  | T1D for 11 years | --                         | Grandmother with T1D                                | --    |
| T1D 8  | T1D for 12 years | --                         | Uncle with T1D                                      | --    |
| T1D 9  | Onset            | --                         | Grandfather with T1D                                | 11.3% |
| T1D 10 | Onset            | --                         | Grandmother with T1D / cousin with T1D              | 10.1% |
| T1D 11 | T1D for 8 years  | --                         | --                                                  | --    |
| T1D 12 | T1D for 4 years  | --                         | --                                                  | --    |
| T1D 13 | T1D for 6 years  | --                         | Mother with T1D                                     | --    |
| T1D 14 | T1D for 6 years  | --                         | Cousin with T1D                                     | --    |
| T1D 15 | T1D for 4 years  | --                         | --                                                  | --    |
| T1D 16 | T1D for 8 years  | --                         | --                                                  | --    |
| T1D 17 | Onset            | --                         | --                                                  | --    |
| T1D 18 | Onset            | HT                         | Grandmother with T2D/ Maternal uncle with T1D       | 10.9% |
| T1D 19 | T1D for 10 years | Coeliac / HT               | Brother with T1D / cousin with T1D                  | —     |
| T1D 21 | T1D for 10 years | --                         | --                                                  | --    |
| T1D 22 | T1D for 4 years  | --                         | Grandfather with T2D                                | --    |
| T1D 23 | Onset            | HT                         | --                                                  | 10.2% |
| T1D 24 | T1D for 4 years  | --                         | Grandfather with T2D                                | --    |
| T1D 25 | Onset            | --                         | --                                                  | 13.2% |
| T1D 26 | Onset            | Coeliac / HT               | --                                                  | --    |
| T1D 27 | T1D for 1 years  | HT                         | --                                                  | --    |
| T1D 28 | Onset            | --                         | --                                                  | 13.2% |
| T1D 30 | T1D for 6 years  | --                         | --                                                  | --    |
| T1D 31 | Onset            | --                         | Mother with T1D / Father with T2D / cousin with T1D | 13.5% |
| T1D 33 | T1D for 9 years  | --                         | --                                                  | --    |
| T1D 35 | T1D for 7 years  | --                         | --                                                  | --    |
| T1D 36 | T1D for 10 years | --                         | --                                                  | --    |
| T1D 37 | Onset            | HT                         | --                                                  | 10.4% |
| T1D 38 | T1D for 1 years  | --                         | Brother with T1D / Father with T2D                  | --    |
| T1D 39 | Onset            | --                         | Grandmother with T2D                                | 10.7% |
| T1D 40 | T1D for 10 years | --                         | Uncle with T1D / grandmother with T2D               | --    |
| T1D 41 | T1D for 5 years  | --                         | Father with T1D                                     | --    |
| T1D 43 | T1D for 3 years  | --                         | Father with T1D                                     | --    |
| T1D 44 | Onset            | --                         | --                                                  | 11%   |
| T1D 46 | Onset            | --                         | Cousin with T1D                                     | 9.5%  |
| T1D 47 | Onset            | --                         | --                                                  | 11.6% |
| T1D 48 | T1D for 4 years  | --                         | Aunt with T1D                                       | --    |
| T1D 49 | Onset            | --                         | --                                                  | 10.2% |
| T1D 50 | Onset            | --                         | --                                                  | 10.4% |
| T1D 51 | Onset            | --                         | Three cousins with T1D / Grandmother with T2D       | 13%   |
| T1D 52 | T1D for 2 years  | --                         | --                                                  | --    |
| T1D 53 | T1D for 5 years  | --                         | --                                                  | --    |
| T1D 54 | T1D for 3 years  | HT                         | --                                                  | --    |
| T1D 55 | T1D for 10 years | --                         | --                                                  | --    |
| T1D 56 | Onset            | --                         | --                                                  | 10.2% |
| T1D 57 | Onset            | --                         | Cousin with T1D / aunt with T1D                     | 9.8%  |
| T1D 58 | Onset            | --                         | Grandmother with T2D / cousin with T1D              | 11.5% |
| T1D 59 | T1D for 4 years  | HT                         | Brother with T1D /                                  | --    |
| T1D 60 | T1D for 14 years | --                         | Uncle with T1D                                      | --    |

|        |                  |              |                                             |       |
|--------|------------------|--------------|---------------------------------------------|-------|
| T1D 61 | T1D for 12 years | --           | --                                          | --    |
| T1D 62 | T1D for 4 years  | --           | --                                          | --    |
| T1D 63 | T1D for 9 years  | --           | --                                          | --    |
| T1D 64 | T1D for 5 years  | --           | --                                          | --    |
| T1D 65 | T1D for 6 years  | --           | --                                          | --    |
| T1D 66 | T1D for 5 years  | Coeliac / HT | --                                          | --    |
| T1D 67 | T1D for 1 years  | --           | --                                          | --    |
| T1D 68 | Onset            | --           | --                                          | 11%   |
| T1D 69 | T1D for 10 years | --           | --                                          | --    |
| T1D 70 | T1D for 8 years  | --           | Uncle with T1D                              | --    |
| T1D 71 | T1D for 7 years  | --           | Grandfather with T2D                        | --    |
| T1D 72 | T1D for 8 years  | --           | --                                          | --    |
| T1D 73 | T1D for 6 years  | --           | --                                          | --    |
| T1D 74 | Onset            | --           | Father's uncle with T1D                     | 10.4% |
| T1D 75 | Onset            | --           | Grandmother with T1D / grandfather with T2D | --    |
| T1D 76 | Onset            | --           | Cousin with T1D                             | 12.3% |
| T1D 77 | T1D for 2 years  | --           | Sister with T1D                             | --    |
| T1D 78 | T1D for 12 years | --           | --                                          | --    |
